# Supplementary material for: Massive functional mapping of a 5′-UTR by saturation mutagenesis, phenotypic sorting and deep sequencing
Source: PubMed Central journal article supplement (PMC3695526; doi:10.1093/nar/gkt267), 2013-04-22
Supplement: supp_gkt267_nar-00102-met-g-2013-File008.pdf [file supp_gkt267_nar-00102-met-g-2013-File008.pdf]

Supplementary information for:

**Massive functional mapping of a 5'UTR by saturation mutagenesis,  
phenotypic sorting and deep sequencing**

Erik Holmqvist, Johan Reimegård and E. Gerhart H. Wagner

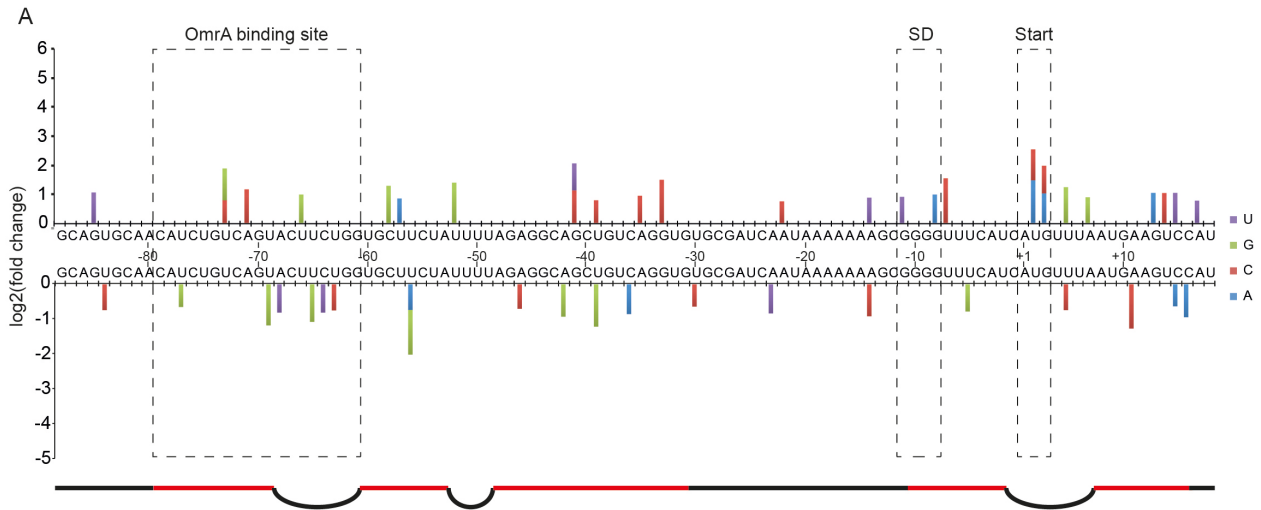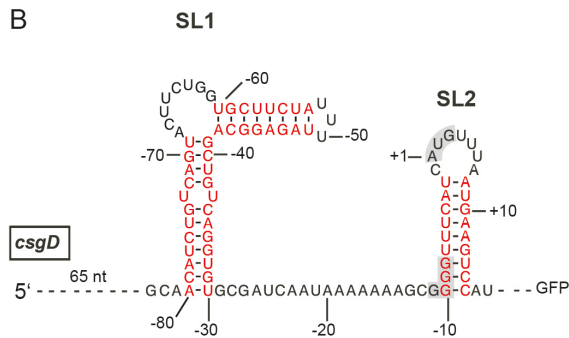

**Supplementary Figure 1.** Mutations associated with lowered *csgD-gfp* expression. (A) Significantly under- and overrepresented mutations in samples that were sorted for low fluorescence in the absence of OmrA compared to samples sorted for all fluorescence levels. Data were generated by Illumina sequencing. The RNA sequence of the *csgD* 5'UTR is shown in the middle of the graph in 5' to 3' direction. Numbers next to the sequence indicate nucleotide positions relative to A in the AUG start codon (set as +1). The OmrA binding site, the SD sequence, and the start codon are indicated with dashed boxes. A schematic under the graph represents the secondary structure of the *csgD* 5'UTR where black lines and bulges indicate unpaired nucleotides while red lines indicate paired nucleotides (same coloring as in (B)). (B) Sequence and secondary structure of the 5'UTR of *csgD* mRNA. Coloring and numbering as in (A).

**Supplementary Table 1. Oligodeoxyribonucleotides used in this study.**

| Name    | Sequence (5' to 3')                             | Used for                         |
|---------|-------------------------------------------------|----------------------------------|
| EHO-560 | ccggagcgcgccagatcgcagctctaagaaacc               | pCsgD::GFP construction          |
| EHO-561 | ccggagcgcgcggcggttgcctact                       | pCsgD::GFP construction          |
| EHO-570 | ggccgaattccgcttccagtcgggaaacc                   | pOmrA construction               |
| EHO-571 | ggccggatccgacgggcttctgctcc                      | pOmrA construction               |
| EHO-572 | ggccggatccccacctgacgtctaagaaacat                | pOmrA construction               |
| EHO-573 | ggccgaattcagcgcagtaaattaggcgcaa                 | pOmrA construction               |
| EHO-522 | cccatttagggctgatttactactaca                     | Error-prone PCR                  |
| EHO-575 | caacaataatgtatgacctgaatacta                     | Error-prone PCR                  |
| EHO-423 | acatagtattcatggtcatacattattgttg                 | SDM: C+15A fwd                   |
| EHO-424 | aaatagtattcatggtcatacattattgttg                 | SDM: C+15A, C+16A fwd            |
| EHO-425 | acttcattaacatgatgaaacccc                        | SDM: rev for EHO-423 and EHO-424 |
| EHO-628 | cacagcagtgcaacatcagtcagctactctgggtgc            | SDM: T-75A fwd                   |
| EHO-629 | gcaccagaagtactgactgatgtgactgctgtg               | SDM: T-75A rev                   |
| EHO-630 | cacagcagtgcaacatccgctcagctactctgggtgc           | SDM: T-75C fwd                   |
| EHO-631 | gcaccagaagtactgacggatgtgactgctgtg               | SDM: T-75C rev                   |
| EHO-632 | cacacagcagtgcaacatctatcagctactctgggtg           | SDM: -74 G:A fwd                 |
| EHO-633 | caccagaagtactgatagatgtgactgctgtgtg              | SDM: -74 G:A rev                 |
| EHO-634 | cacacagcagtgcaacatcttcagctactctgggtg            | SDM: -74 G:T fwd                 |
| EHO-635 | caccagaagtactgaaagatgtgactgctgtgtg              | SDM: -74 G:T rev                 |
| EHO-636 | gtgcaacatctgtcagctacatctgggtcttctattttag        | SDM: -66 T:A fwd                 |
| EHO-637 | ctaaaatagaagcaccagatgactgacagatgttgac           | SDM: -66 T:A rev                 |
| EHO-638 | agcagtgcaacatctgtcagctactatgggtcttatt           | SDM: -64 C:A fwd                 |
| EHO-639 | aatagaagcaccataagtactgacagatgttgactgct          | SDM: -64 C:A rev                 |
| EHO-640 | caacatctgtcagctactcagggtcttctatttttagagg        | SDM: -63 T:A fwd                 |
| EHO-641 | cctctaaaatagaagcacctgaagtactgacagatgttg         | SDM: -63 T:A rev                 |
| EHO-642 | caacatctgtcagctactctagcttctatttttagaggca        | SDM: -62 G:A fwd                 |
| EHO-643 | tgctctaaaatagaagcactagaagtactgacagatgttg        | SDM: -62 G:A rev                 |
| EHO-644 | caacatctgtcagctactctgtgcttctatttttagaggca       | SDM: -62 G:T fwd                 |
| EHO-645 | tgctctaaaatagaagcacagaagtactgacagatgttg         | SDM: -62 G:T rev                 |
| EHO-646 | aacatctgtcagctactctgatgcttctatttttagaggcag      | SDM: -61 G:A fwd                 |
| EHO-647 | ctgctctaaaatagaagcatcagaagtactgacagatgtt        | SDM: -61 G:A rev                 |
| EHO-648 | aacatctgtcagctactctgtgcttctatttttagaggcag       | SDM: -61 G:T fwd                 |
| EHO-649 | ctgctctaaaatagaagcaacagaagtactgacagatgtt        | SDM: -61 G:T rev                 |
| EHO-650 | aacatctgtcagctactctcgtgcttctatttttagaggc        | SDM: -62 G:C fwd                 |
| EHO-651 | gcctctaaaatagaagcacgagaagtactgacagatgtt         | SDM: -62 G:C rev                 |
| EHO-662 | gtgtgcatcaataaaaaaagcgaggttcatcatgttaaatgaagt   | SDM: -10 G:A fwd                 |
| EHO-663 | acttcattaacatgatgaaacctcgcttttttattgatcgcacac   | SDM: -10 G:A rev                 |
| EHO-664 | tgtgcatcaataaaaaaagcgaggttcatcatgttaaatgaagtc   | SDM: -9 G:A fwd                  |
| EHO-665 | gacttcattaacatgatgaaactccgcttttttattgatcgcacaca | SDM: -9 G:A rev                  |

SDM: Site-directed mutagenesis
